# Supplementary material
Source: publisher figshare collection journal article supplement (https://asha.figshare.com/articles/dataset/_/14963544)
Supplement: Supplementary file 1 [file 1]

**Supplementary Table 2.** Examples of syntactically accurate RC constructions with and without minor errors.

| Score | Error type                                      | Target sentence                                                      | Sentence produced                                            |
|-------|-------------------------------------------------|----------------------------------------------------------------------|--------------------------------------------------------------|
| 10    | No errors                                       | The cat caught the mouse that ran around the garden.                 | The cat caught the mouse that ran around the garden.         |
| 9     | Lexical error                                   | Eddie met the girl who broke the <i>window</i> last week.            | Eddie met the girl who broke the <i>thing</i> last week.     |
| 9     | Lexical and grammatical error (change in tense) | The <i>girl ate</i> the sweets that <i>you brought</i> to the party. | The <i>boy eat</i> the sweets you <i>brung</i> to the party. |
