# Supplementary material
Source: publisher figshare collection journal article supplement (https://asha.figshare.com/articles/dataset/_/14963544)
Supplement: Supplementary file 3 [file 1]

**Supplementary Table 1.** Summary of cognitive and language profiles for each of the three groups.

| Variable           | SLI<br>( <i>n</i> = 32) |           |          | AM-TD<br>( <i>n</i> = 32) |           |          | YTD<br>( <i>n</i> = 20) |           |          |
|--------------------|-------------------------|-----------|----------|---------------------------|-----------|----------|-------------------------|-----------|----------|
|                    | <i>M</i>                | <i>SD</i> | Range    | <i>M</i>                  | <i>SD</i> | Range    | <i>M</i>                | <i>SD</i> | Range    |
| Age (years;months) | 6;10                    | 7.12      | 6;0–7;11 | 6;11                      | 6.5       | 6;0–7;11 | 4;9                     | 1.5       | 4;7–4;11 |
| RLS                | 68.4                    | 8.52      | 46 – 81  | 107.8                     | 8.8       | 92 – 125 | 108.5                   | 6.2       | 96 – 120 |
| IQ                 | 97.1                    | 7.61      | 85 – 115 | 104.7                     | 10.2      | 90 – 130 | 110.8                   | 7.8       | 95 – 130 |

*Note.* RLS = Receptive Language Score.
