# Supplementary material
Source: publisher figshare collection journal article supplement (https://asha.figshare.com/articles/dataset/_/14963544)

Supplementary Figure 1.

*Mean % of 10's, 9's and 8's Produced in each Relative Clause Type*

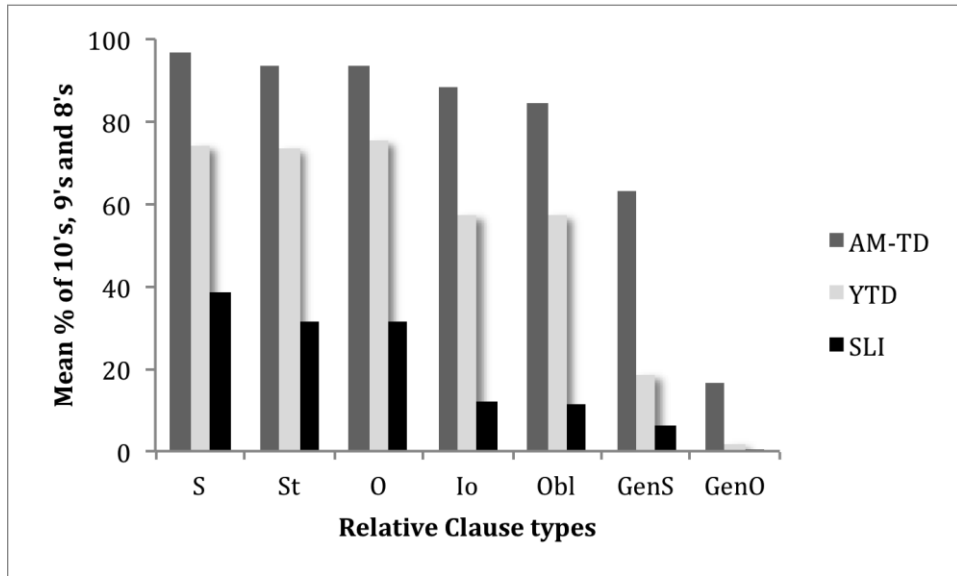

Supplement: Supplementary file 2 [file 1]
